# Supplementary material for: First-in-human immunoPET imaging of HIV-1 infection using 89Zr-labeled VRC01 broadly neutralizing antibody
Source: PubMed Central journal article supplement (PMC8907355; doi:10.1038/s41467-022-28727-5), 2022-03-09
Supplement: 41467_2022_28727_MOESM1_ESM.pdf [file 41467_2022_28727_MOESM1_ESM.pdf]

## SUPPLEMENTARY MATERIAL

### First-in-human ImmunoPET Imaging of HIV-1 Infection using <sup>89</sup>Zr-Labeled VRC01 broadly neutralizing antibody

Denis R. Beckford-Vera<sup>1</sup>, Robert R. Flavell<sup>1</sup>, Youngho Seo<sup>1</sup>, Enrique Martinez-Ortiz<sup>2</sup>, Maya Aslam<sup>1</sup>, Cassandra Thanh<sup>3</sup>, Emily Fehrman<sup>2</sup>, Marion Pardons<sup>4</sup>, Shreya Kumar<sup>3</sup>, Amelia N Deitchman<sup>5</sup>, Vahid Ravanfar<sup>1</sup>, Brailee Schulte<sup>1</sup>, I-Wei Katherine Wu<sup>1</sup>, Tony Pan<sup>3</sup>, Jacqueline D Reeves<sup>3</sup>, Christopher C. Nixon<sup>3</sup>, Nikita S. Iyer<sup>3</sup>, Leonel Torres<sup>3</sup>, Sadie E. Munter<sup>3</sup>, Tony Hyunh<sup>1</sup>, Christos J. Petropoulos<sup>6</sup>, Rebecca Hoh<sup>2</sup>, Benjamin L. Franc<sup>7</sup>, Lucio Gama<sup>8</sup>, Richard A. Koup<sup>8</sup>, John R. Mascola<sup>8</sup>, Nicolas Chomont<sup>4</sup>, Steven G. Deeks<sup>2</sup>, Henry F. VanBrocklin<sup>1\*</sup>, Timothy J. Henrich<sup>3\*</sup> (\*contributed equally)

#### Affiliations

<sup>1</sup> Department of Radiology and Biomedical Imaging, University of California San Francisco, San Francisco, CA, USA

<sup>2</sup> Division of HIV, Infectious Diseases and Global Medicine, University of California San Francisco, San Francisco, CA, USA

<sup>3</sup> Division of Experimental Medicine, University of California San Francisco, CA, USA

<sup>4</sup> Department of Microbiology, Infectiology and Immunology, Centre de Recherche du CHUM, Université de Montréal, Montreal, Quebec, Canada

<sup>5</sup> Department of Clinical Pharmacy, University of California, San Francisco, USA

<sup>6</sup> Monogram Biosciences, Inc., Laboratory Corporation of America, South San Francisco, USA.

<sup>7</sup> Department of Radiology, Stanford University, Palo Alto, CA, USA

<sup>8</sup> Vaccine Research Center, National Institute for Allergy and Infectious Diseases, National Institutes of Health, Bethesda, Maryland, USA

#### Communicating Authors:

Timothy J. Henrich, MD, MSc

1001 Potrero Avenue, Bldg 3, Room 525A, San Francisco, CA, 94110

Timothy.Henrich@ucsf.edu

628-206-5518

ORCID: 0000-0002-6684-0622

Henry F. VanBrocklin, PhD

185 Berry Street Bldg B, San Francisco CA 94158

Henry.Vanbrocklin@ucsf.edu

415-353-4569

ORCID: 0000-0003-2849-0841

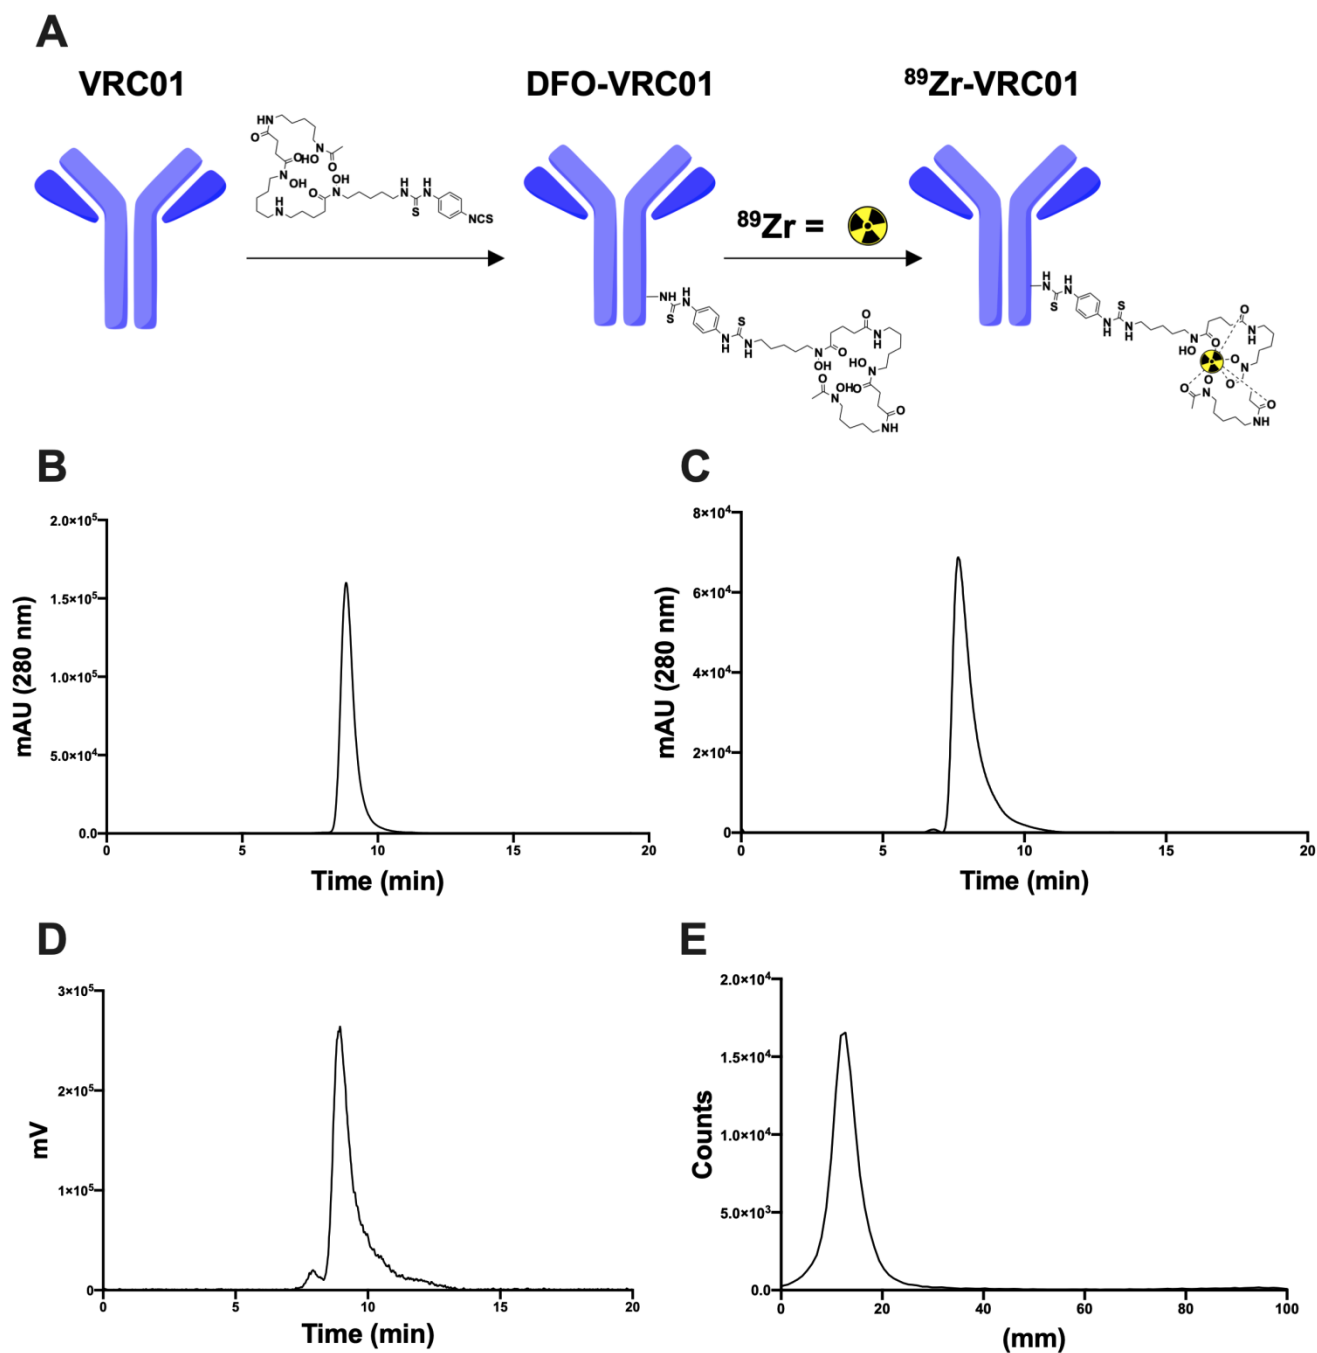

**Figure S1.** Synthesis and characterization of  $^{89}\text{Zr}$ -VRC01. (A) Schematic representation of  $^{89}\text{Zr}$ -VRC01 synthesis scheme showing the conjugation of DFO to an amine in the antibody backbone through an activated ester and subsequent chelation of the zirconium-89 to give  $^{89}\text{Zr}$ -VRC01. High Performance Liquid Chromatography (HPLC) trace using size exclusion chromatography of (B) unmodified VRC01 (UV @ 280 nm), (C) DFO-VRC01 showing no significant aggregation after conjugation of VRC01 with DFO (UV @ 280 nm) and (D)  $^{89}\text{Zr}$ -VRC01 (radioactive detection). (E) Instant thin layer chromatography (iTLC) of purified  $^{89}\text{Zr}$ -VRC01 demonstrating that  $^{89}\text{Zr}$ -VRC01 was obtained with radiochemical purity higher than 98%.

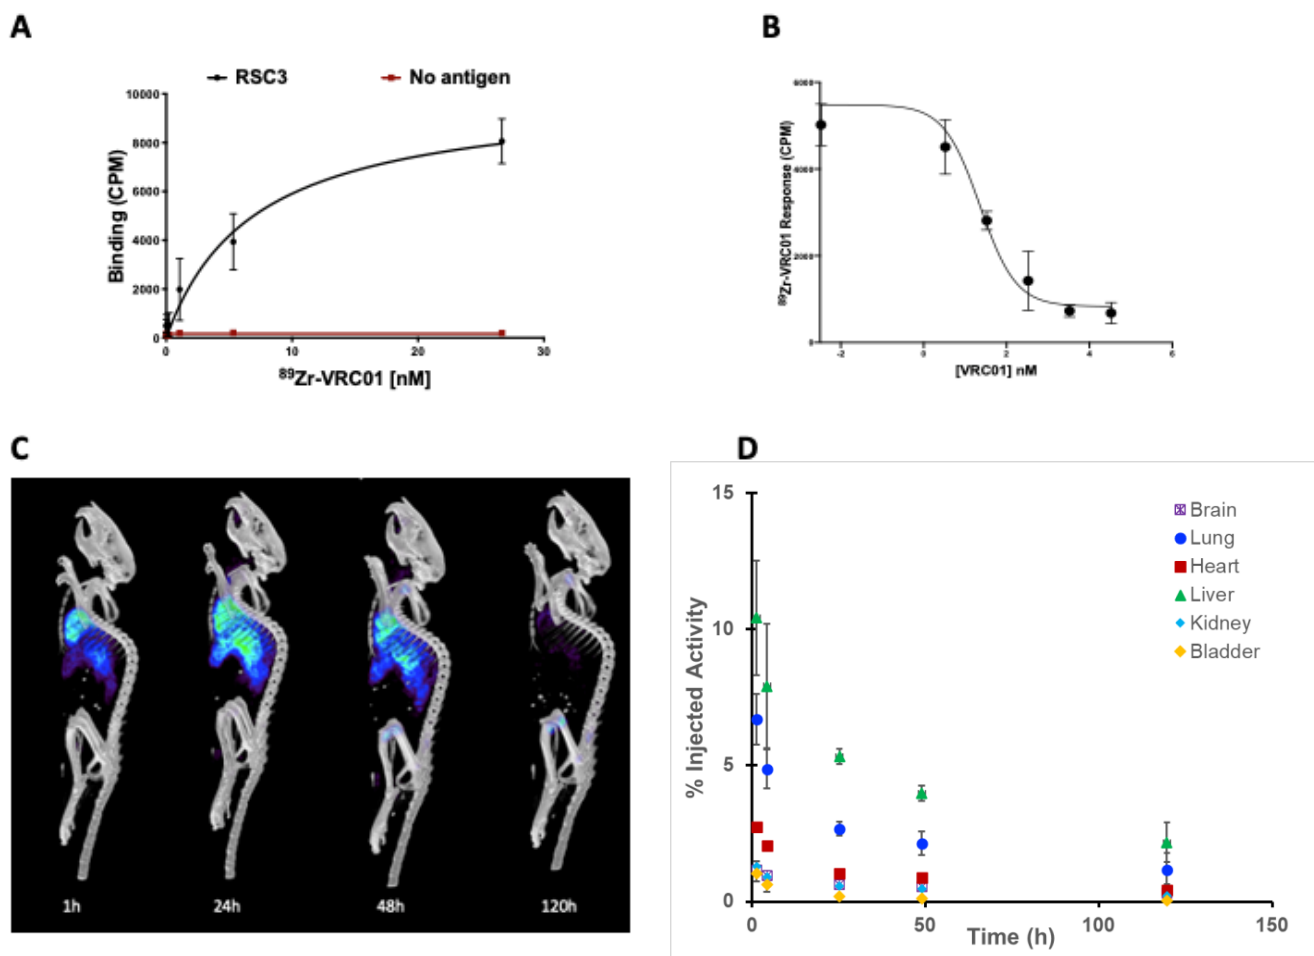

**Figure S2.**  $^{89}\text{Zr-VRC01}$  binding capacity. **(A)** Binding saturation assay of  $^{89}\text{Zr-VRC01}$  using a resurfaced stabilized core (RSC3) recombinant protein that was used to isolate VRC01. <sup>1</sup>  $K_D$  value for  $^{89}\text{Zr-VRC01}$  is  $5.21 \pm 0.84$  ( $n = 3$ ,  $R^2 = 0.9232$ ), comparable to the values reported using surface plasma resonance ( $K_D = 5.62$  nM). <sup>2</sup> **(B)** Binding competition assay using unmodified VRC01 to compete with  $^{89}\text{Zr-VRC01}$  for binding to RSC3 ( $\text{IC}_{50} = 22.7$  nM), demonstrating specific binding of  $^{89}\text{Zr-VRC01}$  to RSC3. **(C)** Pharmacokinetic study of  $^{89}\text{Zr-VRC01}$  in healthy Balb-C mice (5 males/5 females) by small animal Positron Emission Tomography/Computed Tomography (PET/CT) imaging following injection of  $150 \mu\text{Ci}$  ( $5.55$  MBq)  $^{89}\text{Zr-VRC01}$ . **(D)** Tissue/Organ time activity curves of  $^{89}\text{Zr-VRC01}$  derived from the pharmacokinetics study. Error bars represent mean and standard deviation. Source data are provided as a Source Data file.

**Table S1.** <sup>89</sup>Zr-VRC01 Absorbed dose (mGy/MBq) obtained from the early study human participants (N=6) compared to the extrapolated values estimated from the preclinical pharmacokinetic studies in mice (shown in supplementary Figure 2C and 2D).

| <b>Organ</b>                    | <b>Human data<br/>(mGy/MBq)</b> |                | <b>Extrapolated from<br/>murine data<br/>(mGy/MBq)</b> |                |
|---------------------------------|---------------------------------|----------------|--------------------------------------------------------|----------------|
| Adrenals                        | 0.661                           | ± 0.136        | 0.360                                                  | ± 0.005        |
| Brain                           | 0.084                           | ± 0.014        | 0.149                                                  | ± 0.006        |
| Breasts                         | 0.252                           | ± 0.044        | 0.227                                                  | ± 0.003        |
| Gallbladder Wall                | 0.986                           | ± 0.226        | 0.391                                                  | ± 0.008        |
| LLI Wall                        | 0.258                           | ± 0.048        | 0.325                                                  | ± 0.004        |
| Small Intestine                 | 0.356                           | ± 0.070        | 0.342                                                  | ± 0.004        |
| Stomach Wall                    | 0.381                           | ± 0.073        | 0.325                                                  | ± 0.004        |
| ULI Wall                        | 0.415                           | ± 0.085        | 0.339                                                  | ± 0.004        |
| Heart Wall                      | 0.807                           | ± 0.110        | 0.443                                                  | ± 0.005        |
| Kidneys                         | 1.005                           | ± 0.200        | 0.393                                                  | ± 0.010        |
| Liver                           | 2.905                           | ± 0.725        | 0.514                                                  | ± 0.026        |
| Lungs                           | 0.527                           | ± 0.095        | 0.424                                                  | ± 0.011        |
| Muscle                          | 0.271                           | ± 0.051        | 0.269                                                  | ± 0.003        |
| Pancreas                        | 0.586                           | ± 0.119        | 0.369                                                  | ± 0.005        |
| Red Marrow                      | 0.293                           | ± 0.055        | 0.273                                                  | ± 0.003        |
| Osteogenic Cells                | 0.333                           | ± 0.063        | 0.376                                                  | ± 0.005        |
| Skin                            | 0.186                           | ± 0.035        | 0.193                                                  | ± 0.003        |
| Spleen                          | 0.326                           | ± 0.060        | 0.313                                                  | ± 0.004        |
| Testes                          | 0.191                           | ± 0.036        | 0.257                                                  | ± 0.003        |
| Thymus                          | 0.332                           | ± 0.051        | 0.307                                                  | ± 0.003        |
| Thyroid                         | 0.213                           | ± 0.039        | 0.275                                                  | ± 0.003        |
| Urinary Bladder Wall            | 0.296                           | ± 0.038        | 0.332                                                  | ± 0.002        |
| Total Body                      | 0.343                           | ± 0.067        | 0.278                                                  | ± 0.003        |
| <b>Effective Dose (mSv/MBq)</b> | <b>0.443</b>                    | <b>± 0.085</b> | <b>0.318</b>                                           | <b>± 0.004</b> |



**Table S3.** HIV-1 Env Loop D, CD4 binding site and hypervariable region 5 amino sequencing from PBMC DNA obtained prior to PET-MR imaging. \*Intact sequences were not able to be obtained from ART-suppressed participant A3 who was on ART for the longest duration (approximately 23 years).

| ID | Group   | Loop D         | CD4 Binding Site | Variable Loop 5                |
|----|---------|----------------|------------------|--------------------------------|
| V1 | Viremic | ENFTDNGKIIIVQL | TQHSGGDPEIVMHSFN | TRDGGNGSENGTQVFRPEGGNMRDN      |
| V2 | Viremic | ANFSDNAKTIIVQL | KPSAGGDPEVVMHMFN | TRGDGGNQTNGTETFRPGGGDMRDN      |
| V3 | Viremic | DNFSNNAKTIIVQL | NHSSGGDLEVVMHSFN | TRDGGNNNSMNETFRPGGGDMRDN       |
| V4 | Viremic | ENFNMWKNNMVE   | KRSSGGDPEIVMHSFI | TRDGGTNESEGNETFRPGGGNMMDN      |
| V5 | Viremic | ANFSDNAKTIIVQL | NSSSGGDPEIVMHSFN | THDSGSSVERNNDTETFRPRRRDMKDN    |
| A1 | ART     | KNLSDNAKTIIVQL | DKSSGGDLEVEMLTFN | VRDGGQKNGTNETFRPGGGNMKDN       |
| A2 | ART     | ENLTNNAKIIIVHL | NSSSGGDPEIVMHSFN | TRDGGIGNNTSNTETFRPAGGDMRDN     |
| A3 | ART     | *              | *                | *                              |
| A4 | ART     | DNFSDNAKTLIVQL | NQSSGGDPEIVMHTFN | TRDGG(N/D)ED(T/A)ATFTPGGGNMKDN |
| A5 | ART     | QNISDNTKIIIVQL | NHSSGGDPEIVMHSFN |                                |

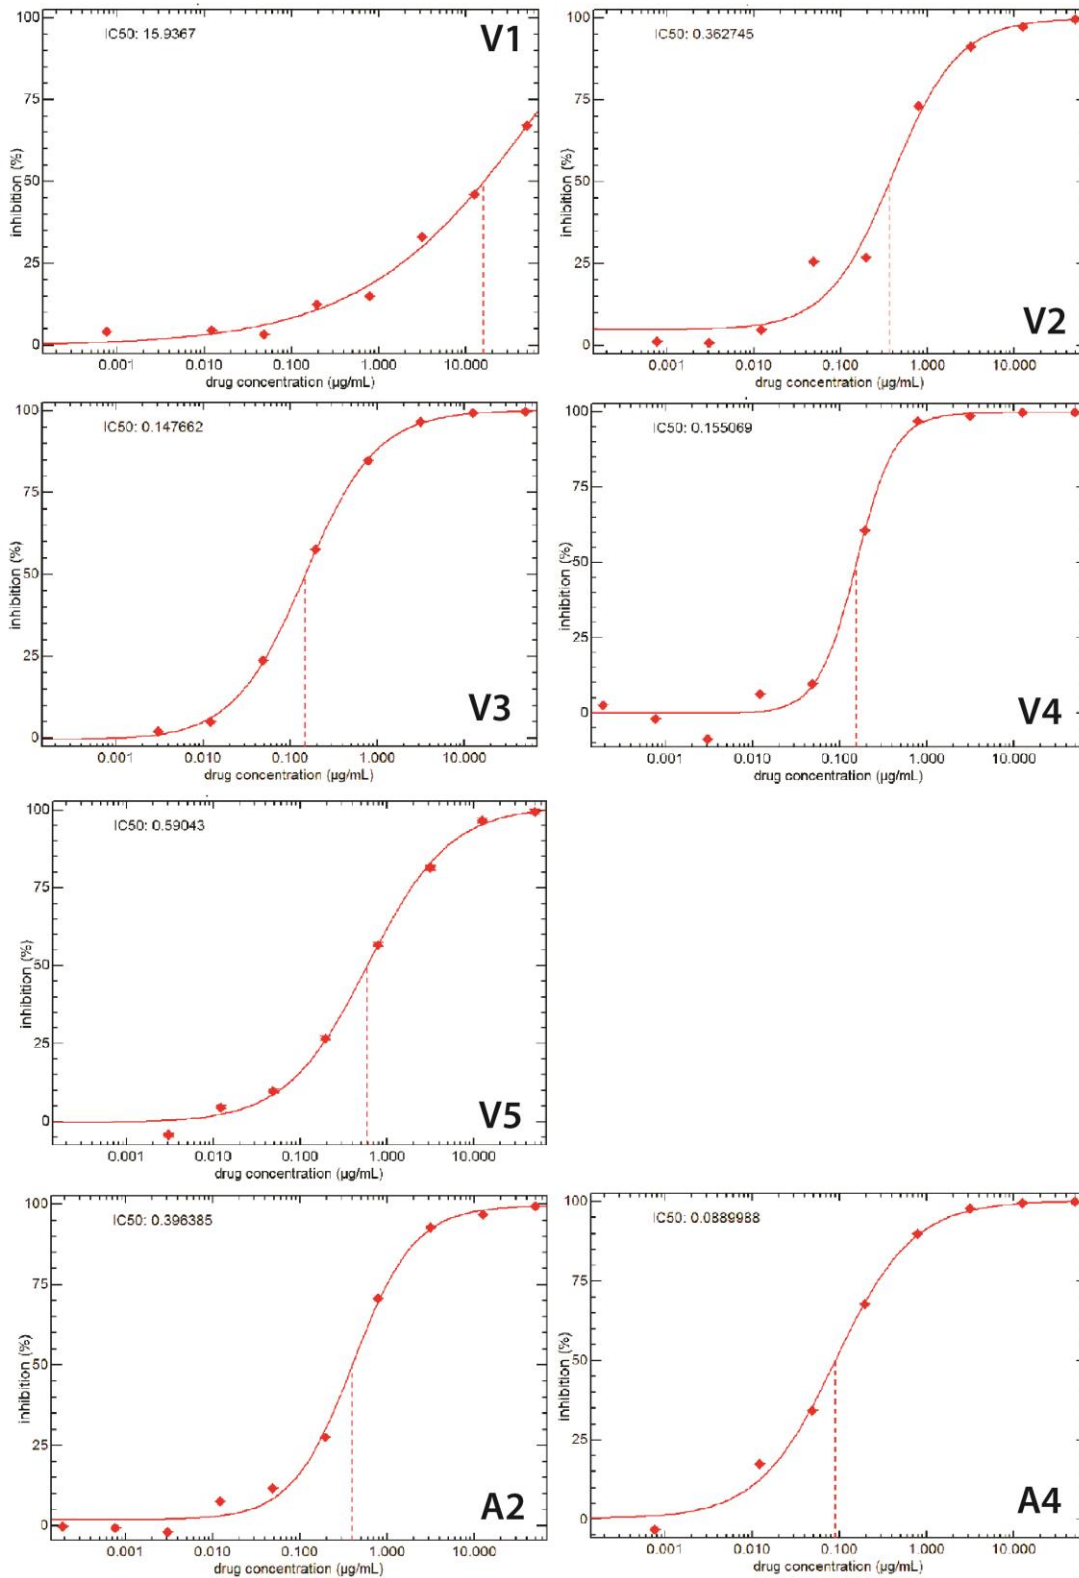

**Figure S3.** Inhibition of participant-derived pseudoviruses to VRC01 using the Phenosense mAb assay (Monogram Biosciences). IC<sub>50</sub> = 50% inhibitory concentration (represented by the dashed red line).

**Table S4.** Fold Changes in Blood Pool-Adjusted Standardized Uptake Values Between Viremic and ART-Suppressed Participants and Uninfected Controls for Tissue Regions of Interest

| Tissue Region of Interest         | Imaging Day 0                               | Imaging Day 1                  | Imaging Day 3                  |                            |
|-----------------------------------|---------------------------------------------|--------------------------------|--------------------------------|----------------------------|
|                                   | Fold Change <sup>a</sup><br>Viremic/Control | Fold Change<br>Viremic/Control | Fold Change<br>Viremic/Control | Fold Change<br>ART/Control |
| Inguinal LN rSUVmax               | <b>2.35*</b>                                | 3.24 <sup>‡</sup>              | <b>3.04**</b>                  | 1.52                       |
| Inguinal LN rSUVmean              | <b>2.47*</b>                                | 3.08 <sup>‡</sup>              | <b>2.52**</b>                  | <b>1.99*</b>               |
| Axiallry LN rSUVmax               | <b>2.29*</b>                                | 4.94 <sup>‡</sup>              | <b>3.32**</b>                  | 1.29                       |
| Axiallry LN rSUVmean              | <b>2.77*</b>                                | 3.45 <sup>‡</sup>              | <b>2.85**</b>                  | 1.12                       |
| Gut (coronal gating) rSUVmax      | 1.16                                        | 1.69 <sup>‡</sup>              | 1.30                           | 1.09                       |
| Gut (coronal gating) rSUVmean     | <b>2.49*</b>                                | 2.60 <sup>‡</sup>              | <b>2.76**</b>                  | <b>2.72*</b>               |
| Descending/Sigmoid Colon rSUVmax  | <b>6.39*</b>                                | 4.8 <sup>‡</sup>               | <b>6.4**</b>                   | <b>5.44**</b>              |
| Descending/Sigmoid Colon rSUVmean | <b>6.53*</b>                                | 2.9 <sup>‡</sup>               | <b>3.66**</b>                  | 2.59                       |
| Anorectal Junction rSUVmax        | 1.76                                        | 3.27 <sup>‡</sup>              | <b>4.1*</b>                    | 3.54                       |
| Anorectal Junction rSUVmean       | 1.71                                        | 2.1 <sup>‡</sup>               | <b>3.6*</b>                    | 1.69                       |
| Nasal Turbinates rSUVmax          | 0.97                                        | 1.40 <sup>‡</sup>              | <b>1.53*</b>                   | <b>1.55*</b>               |
| Nasal Turbinates rSUVmean         | 0.80                                        | 0.94 <sup>‡</sup>              | 0.93                           | 1.16                       |
| Iliac Marrow rSUVmax              | 1.06                                        | 2.16 <sup>‡</sup>              | <b>1.74*</b>                   | <b>1.27*</b>               |
| Iliac Marrow rSUVmean             | 1.44                                        | 1.63                           | 1.57                           | <b>1.76*</b>               |
| Femoral Marrow rSUVmax            | 1.01                                        | 1.39 <sup>‡</sup>              | <b>1.76*</b>                   | 1.67                       |
| Femoral Marrow rSUVmean           | 1.59                                        | 1.65 <sup>‡</sup>              | 1.40                           | <b>2.92*</b>               |

rSUV = ratio of SUV between tissue of interest and blood pool

<sup>a</sup> Fold change in blood pool adjusted SUVmax or SUVmean values

\* P < 0.05 by Mann-Whitney testing of rSUV values between imaging groups

\*\* P < 0.01 by Mann-Whitney testing of rSUV values between imaging groups

<sup>‡</sup> Statistical analyses not performed as N < 4 (participant V2 did not complete Day 1 imaging)



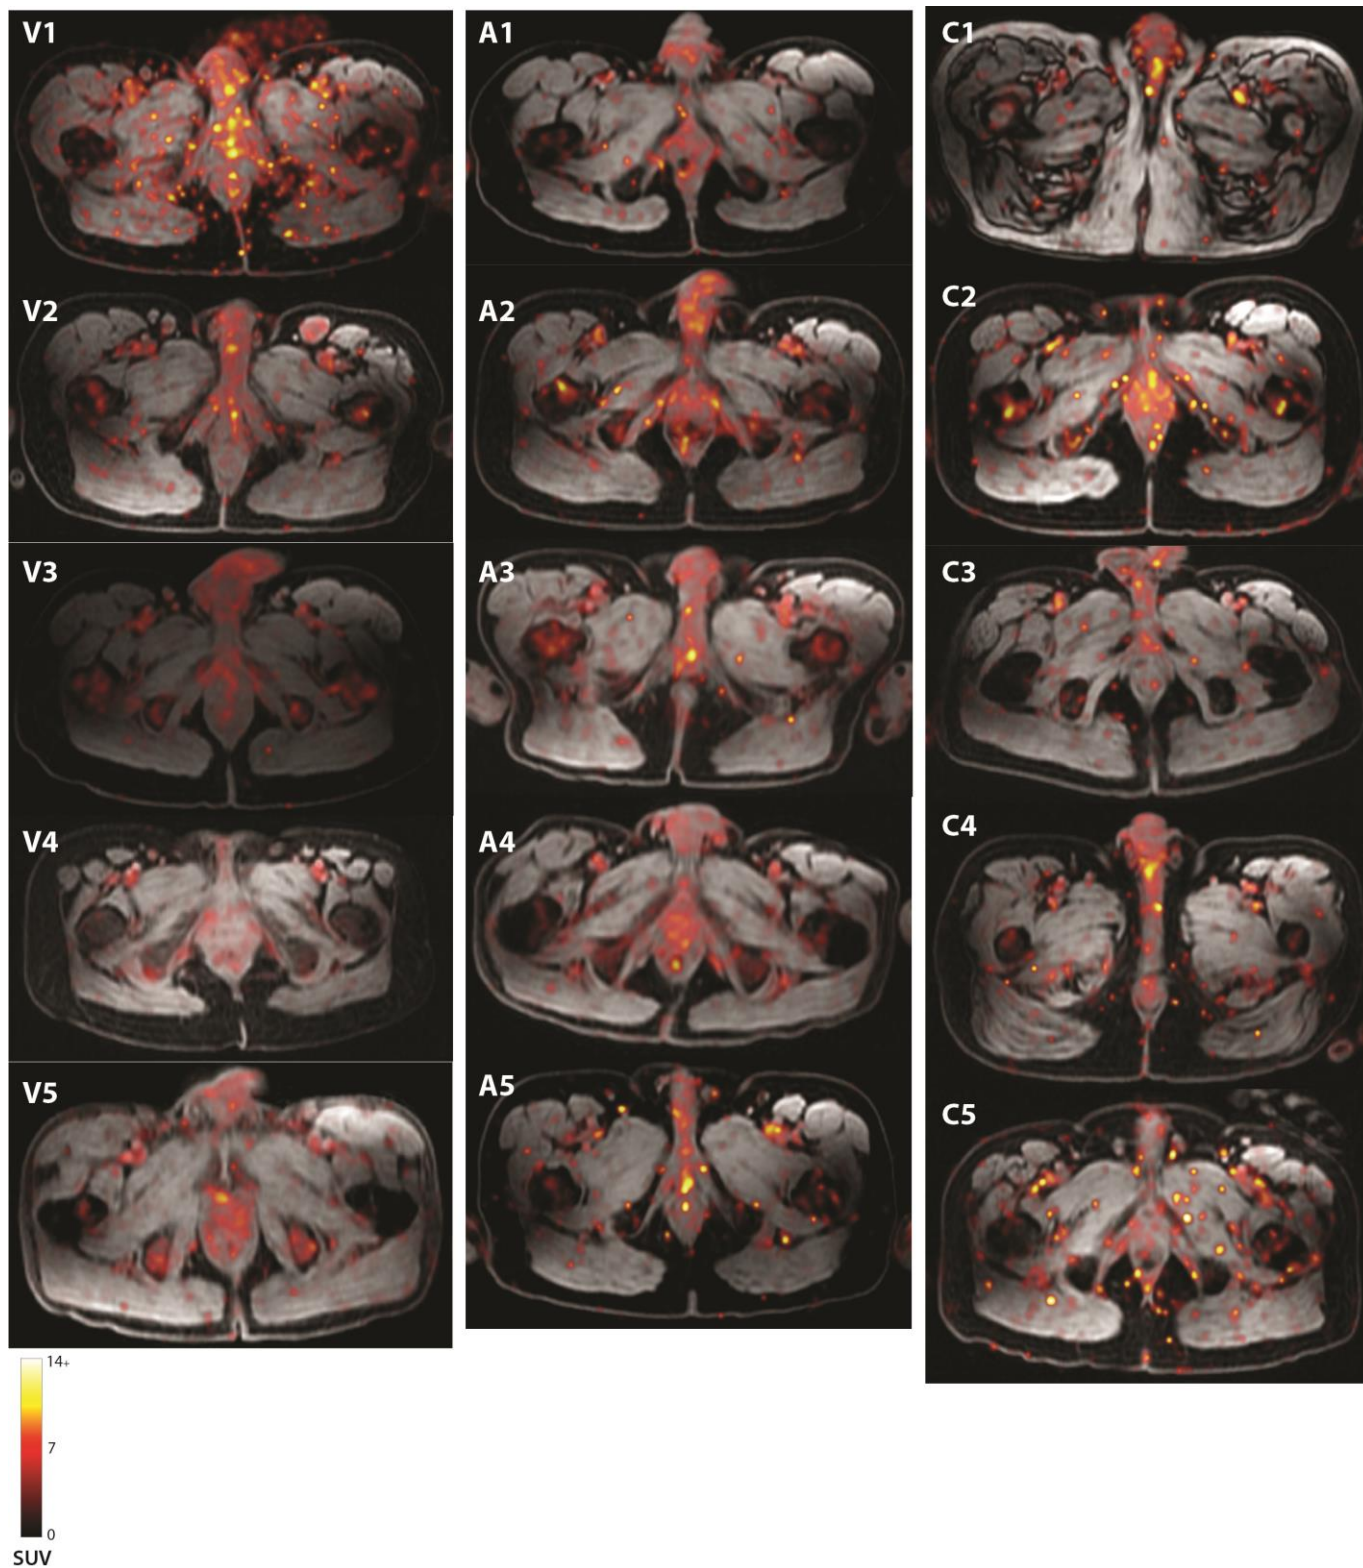

**Figure S4.** Axial PET-MR images of inguinal lymph node regions from all participants 72 hours following  $^{89}\text{Zr}$ -VRC01 administration. V = viremic; A = ART suppressed; C = uninfected control.

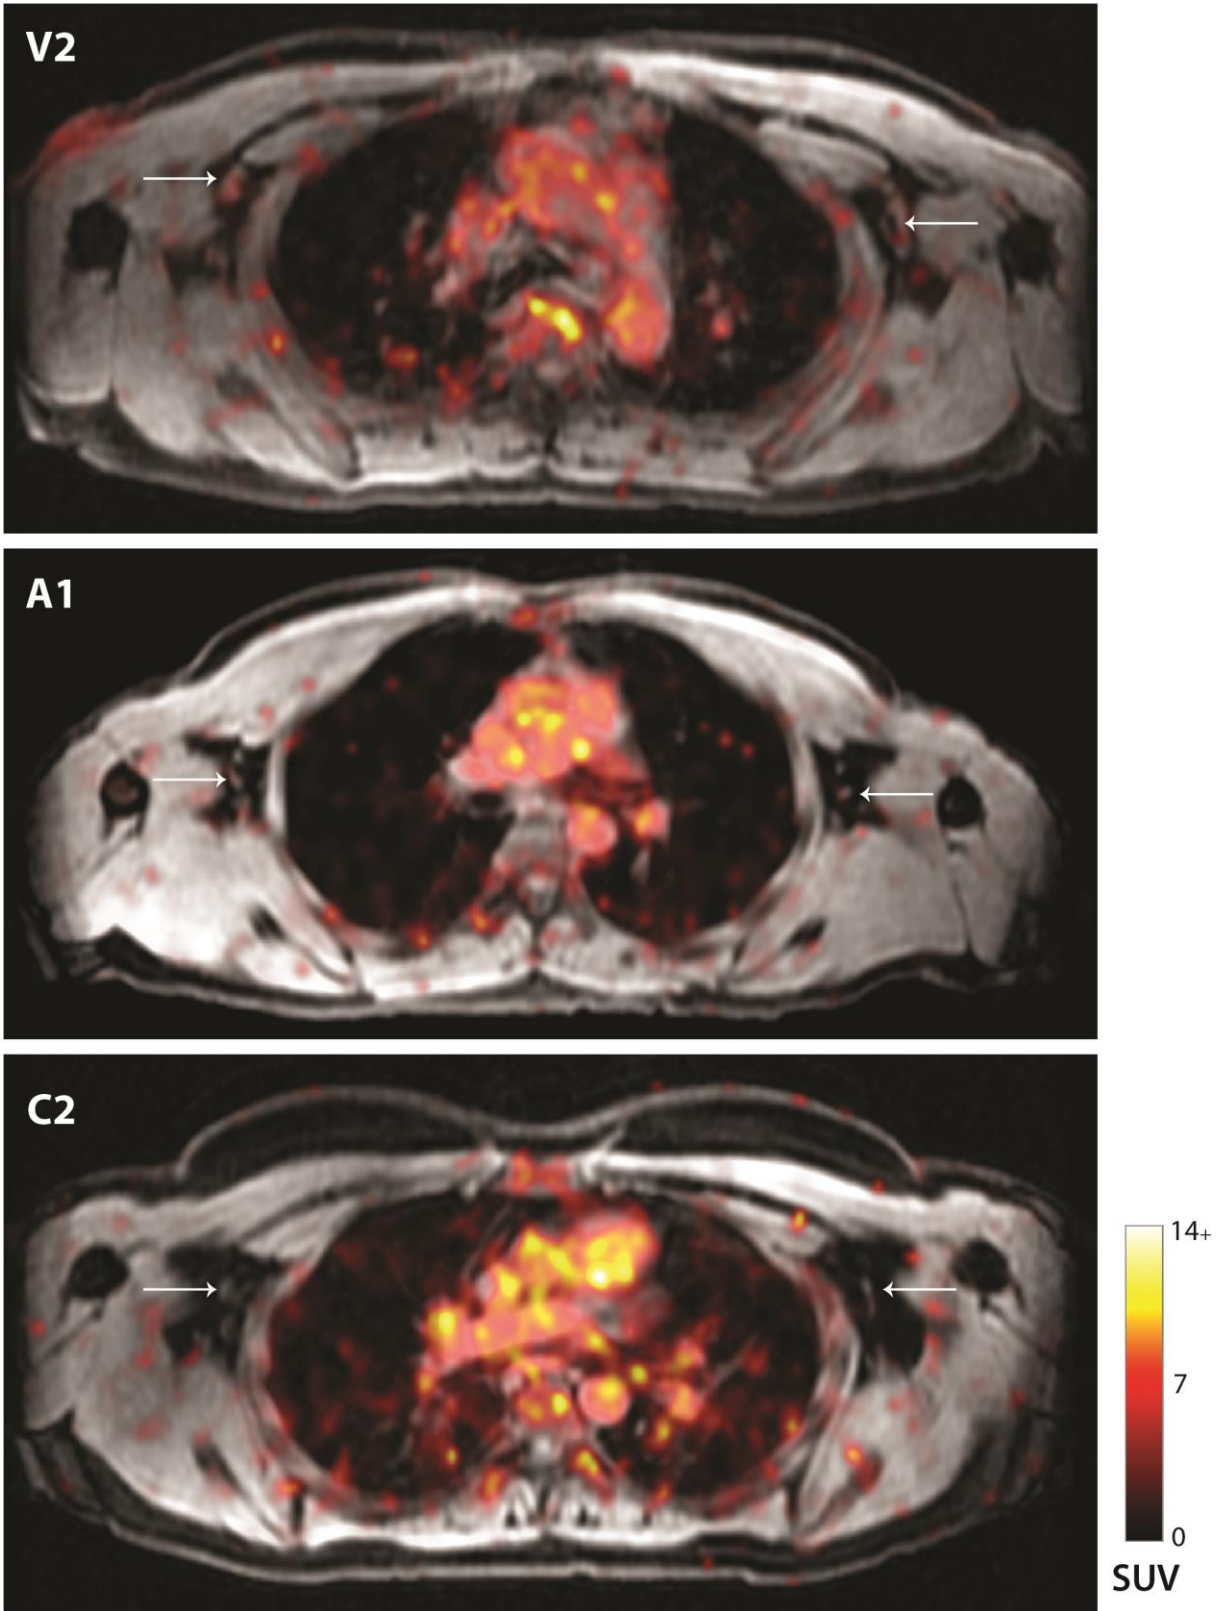

**Figure S5.** Axial PET-MR images of axillary lymph node regions from representative viremic, ART suppressed and control participants 72 hour following  $^{89}\text{Zr}$ -VRC01 administration. White arrows show individual lymph nodes.

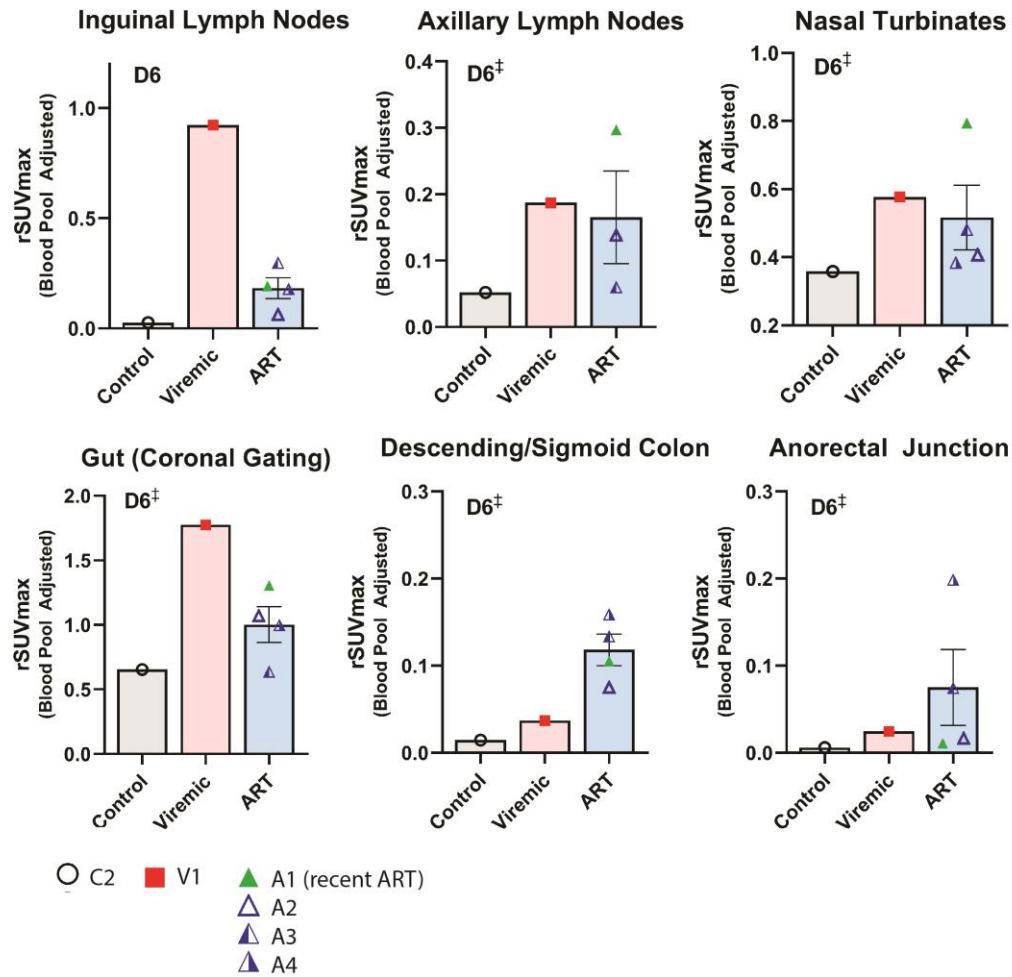

**Figure S6.** Tracer uptake in tissue 6 days after injection. rSUV max values from inguinal and axillary lymph nodes, nasal turbinates, coronally gated gut tissue, colon and anorectal wall tissue from PET/MR imaging approximately 144 hours following <sup>89</sup>Zr-VRC01 administration in an exploratory subset of participants to determine uptake detection over extended periods of time. rSUV = blood pool-adjusted <sup>89</sup>Zr-VRC01 standardized uptake value; mean and standard error bars are shown. Control N = 1, viremic N = 1, ART N = 4. Source data are provided as a Source Data file.

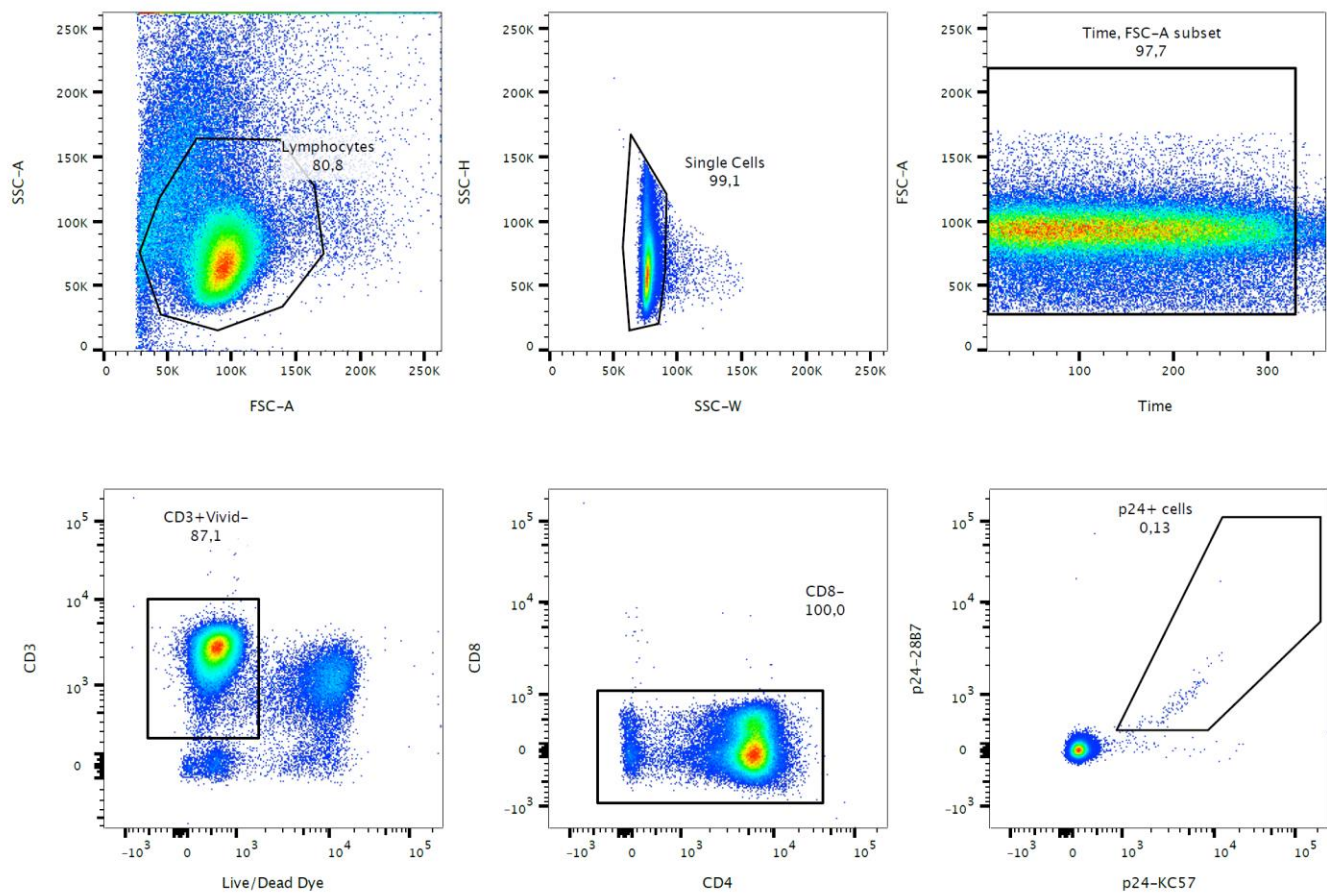

**Figure S7.** Flow cytometry gating. Example of flow cytometric gating of blood and lymph node T cells expressing HIV p24 antigen. Results from the p24 HIV flow assay are presented in Figure 6b of the main manuscript.

### Supplementary References:

1. Lynch, R. M. *et al.* The development of CD4 binding site antibodies during HIV-1 infection. *Journal of Virology* 86, 7588–7595 (2012).
2. Wu, X. *et al.* Rational design of envelope identifies broadly neutralizing human monoclonal antibodies to HIV-1. *Science* 329, 856–861 (2010).
